# *In vivo* single-molecule imaging of RecB reveals efficient repair of DNA damage in *Escherichia coli*

Alessia Lepore<sup>1,2,3</sup>, Daniel Thédié<sup>1,2</sup>, Lorna McLaren<sup>1,2</sup>, Benura Azeroglu<sup>1,4</sup>,  
Oliver J. Pambos<sup>5</sup>, Achillefs N. Kapanidis<sup>5</sup> and Meriem El Karoui<sup>1,2, \*</sup>

<sup>1</sup>Institute of Cell Biology, University of Edinburgh, Edinburgh, UK; <sup>2</sup>Centre for Synthetic and Systems Biology (SynthSys), University of Edinburgh, UK; <sup>3</sup>Laboratory for Optics and Biosciences, École Polytechnique, Institut Polytechnique de Paris, Palaiseau, FR; <sup>4</sup>Laboratory of Genome Integrity, National Cancer Institute (NCI), National Institutes of Health (NIH), Bethesda, MD, USA; <sup>5</sup>Biological Physics Research Group, Kavli Institute for Nanoscience Research, Department of Physics, University of Oxford, Oxford, UK

## Abstract

Efficient DNA repair is crucial for maintaining genome integrity and ensuring cell survival. In *Escherichia coli*, RecBCD plays a crucial role in processing DNA ends following a DNA double-strand break (DSB) to initiate repair by homologous recombination. While RecBCD has been extensively studied *in vitro*, less is known about how it contributes to rapid and efficient repair in living bacteria. Here, we perform single-molecule microscopy to investigate DNA repair in real-time in *E. coli*. We quantify RecB single-molecule mobility and monitor the induction of the DNA damage response (SOS response) in individual cells. We show that RecB binding to broken DNA ends leads to efficient repair without SOS induction. In contrast, in a RecB mutant with modified activities leading to the activation of an alternative repair pathway, repair is less efficient and leads to high SOS induction. Our findings reveal how subtle alterations in RecB activity profoundly impact the efficiency of DNA repair in *E. coli*.

## 1 INTRODUCTION

DNA repair is a fundamental mechanism that ensures chromosome maintenance and cell survival after DNA damage [1]. Among the different kinds of DNA lesions, DNA Double Strand Breaks (DSBs) are one of the most threatening to genome stability. Unrepaired DSBs can lead to cell death, while incomplete or faulty repair can induce mutagenesis and genome rearrangement [2]. DSBs can be caused by endogenous or exogenous causes such as the collapse or stalling of replication forks, oxygen radicals, ionizing radiation and DNA-damaging agents [3]. DNA replication is the main physiological source of DSB. In *Escherichia coli*, 18% of cells per generation experience spontaneous replication fork breakage [4]. Quinolone antibiotics, which target DNA-topoisomerase, disrupt DNA replication to induce DSBs, ultimately leading to bacterial cell death. This class of antibiotic, binding to the topoisomerase-DNA complex, interferes with changes in the DNA supercoiling and causes the arrest of the replication machinery. Consequently, to remove the block on the replication fork, DSBs are formed [5]. However, DSBs can be repaired through homologous recombination, in which the missing information is copied from another intact, identical chromosome [6].

---

\*To whom correspondence should be addressed. Email: Meriem.Elkaroui@ed.ac.uk

32 In *E. coli*, the initial phase of the repair pathway involves the heterotrimer complex RecBCD [3]. This complex  
33 plays a crucial role in repairing DSBs by binding to DNA ends and processing them for subsequent homologous  
34 recombination. RecBCD is expressed at very low levels in cells [7] and the regulation of its expression levels is  
35 crucial for the cell's DNA repair capability [8]. Although RecBCD expression is not regulated by DNA damaging  
36 events, both deletion and over-expression of RecBCD strongly affect DNA repair, cell viability and homologous  
37 recombination [9, 10, 11]. After it locates the DNA ends, RecBCD utilizes its two helicase motors with distinct  
38 polarities, namely RecB with a 3' → 5' direction and RecD with a 5' → 3' direction, to translocate along both DNA  
39 strands. During this translocation process, RecB's nuclease activity actively degrades both DNA strands until it  
40 encounters a specific octameric DNA sequence known as  $\chi$ -site (5'-GCTGGTGG-3'). The recognition of the  $\chi$ -site  
41 triggers a modulation in RecBCD's biochemical activities, leading to a drastic reduction in RecB's nuclease activity  
42 at the 3' single-stranded DNA region. This alteration facilitates the loading of the RecA protein onto the 3' single-  
43 stranded DNA tail by RecBCD, forming a RecA-ssDNA filament. The RecA filament then catalyses homology  
44 search and strand invasion, facilitating replication restart.

45 RecA binding to single-stranded DNA also triggers LexA autoproteolysis, which activates the SOS regulon  
46 genes, allowing *E. coli* to respond to and repair DNA damage [12]. The SOS regulon comprises approximately 40  
47 genes. Among the genes regulated by LexA are DNA repair genes such as RecA, and inhibitors of cell division e.g.  
48 Sula [13, 12]. Inhibition of cell division by Sula results in bacterial cells appearing as elongated with an increased  
49 cell area in comparison to cells without DNA damage [14].

50 *In vitro* studies have not only demonstrated the crucial role of RecBCD activity in recognizing and processing  
51 damaged DNA ends but have also highlighted its significance in ensuring the successful formation of the RecA  
52 ssDNA filament [15, 16, 17, 18, 19, 20]. The study of RecBCD crystal structure bound to a DNA hairpin allowed  
53 an understanding of how RecBCD interacts with DNA clarifying the fate of the 3' ssDNA after the RecC domain  
54 recognises the  $\chi$ -site. While RecBCD keeps degrading the 5' side and translocating on the DNA, RecA is recruited  
55 on the forming ssDNA loop [15]. Interestingly, RecA recruitment has been associated with the presence of the RecB  
56 nuclease domain. RecBCD mutants in which the RecB nuclease function is inactivated fail to recruit RecA to the 3'  
57 ssDNA [21, 22, 23]. In particular, the *recBD1080A* mutant (known as *recB1080*) contains a single point mutation  
58 that inactivates the nuclease domain. *In vitro* data shows that RecB1080 is a functional helicase that unwinds DNA  
59 without degrading the 3' ssDNA. However, it has been observed that, while it still recognizes  $\chi$  sites, it does not  
60 promote RecA loading onto the ssDNA.

61 The precise mechanism by which RecBCD disengages from the DNA remains to be fully elucidated. *In vitro*  
62 observations have led to the formulation of a model [24], suggesting that the RecBCD dissociation process is initiated  
63 after recognition of the  $\chi$ -site. According to this hypothesis, post  $\chi$ -site recognition, RecBCD continues to unwind  
64 the DNA beyond the  $\chi$ -site and then the subunits disengage from the DNA. In this model, the possible impact  
65 of the RecA filament formation on RecBCD-DNA dissociation is not taken into account. However, considering

66 the role of the RecB nuclease domain in recruiting RecA to the ssDNA and the intricate topological shape of the  
67 RecBCD-DNA-RecA complex, it may play a role in RecBCD disengagement from the DNA.

68 While *in vitro* studies have laid the foundations of the mechanisms of the repair and the enzyme's activities,  
69 *in vivo* observations gain a deeper understanding of how DSB repair happens in the complex environment of the  
70 live cell. The homologous recombination event following DSB repair has been observed in live *E. coli*. Employing  
71 various methods to cause DNA DSBs, RecA filament formation and activity have been monitored using different  
72 fluorescent fusions and labelling techniques [25, 26, 27, 28]. In a recent live-cell study, the observation of the  
73 disappearance of fluorescent loci placed on the DNA after DSB induction confirmed that, in *E. coli*, RecBCD exhibits  
74 high translocating speed on DNA (up to  $\sim 1.6$  kb/s) and high degradation activity ( $\sim 100$  kb) [29]. Although recent  
75 work explored RecB mobility after mitomycin C treatment [30], it is still unclear how RecBCD dynamics change in  
76 response to various levels of DNA damage. Understanding RecBCD dynamics at different levels of DNA damage is  
77 crucial to reveal how different amounts of DSBs are detected and processed *in vivo*.

78 To characterize RecBCD-mediated DSBs repair *in vivo*, we observed and quantified the mobility of single RecB  
79 molecules in live *E. coli* in real-time. RecB has a crucial role in functionality since it is the only subunit of the com-  
80 plex that acts as both nuclease and helicase, and as such, RecB is an excellent candidate to study RecBCD activities.  
81 We induced different levels of DNA damage using a fluoroquinolone antibiotic, ciprofloxacin, while monitoring  
82 the SOS response in the bacterial population. We observed how the RecB molecular mobility changes at different  
83 DNA damage levels. We identified three sub-populations of RecB molecules, each describing RecB mobility within  
84 bacterial cells. Furthermore, we determined that the fraction of RecB molecules involved in the repair process is pro-  
85 portional to the level of DNA damage. To explore the impact on DSB repair when RecBCD cannot promote RecA  
86 filament formation, we quantified the mobility and the SOS induction in the *recB1080* mutant. Our observations  
87 are consistent with a model based on previous *in vitro* observations [23], which suggests an alternative pathway for  
88 loading RecA onto single-stranded DNA when RecB-mediated RecA loading is impaired. This implies that *in vivo*,  
89 the alternative repair pathway operates on a longer time scale and with reduced efficiency compared to the repair  
90 process in the WT.

## 91 **2 MATERIALS AND METHODS**

### 92 **2.1 Strains and plasmid construction**

93 *E. coli* MG1655 strain and its derivatives were used in this study. The characteristics of all the strains and plasmids  
94 employed are described in Table 1. The construction of the strain carrying the RecB-HaloTag fusion (MEK65) is de-  
95 scribed in [7]. To build the strains containing the GFP expression reporter (MEK707 and MEK2324), *PsulA-mGFP*  
96 was cloned into a pOSIP plasmid [31] and integrated at a chromosomal locus into the genome by clone integration  
97 [31]. The construction of the pOSIP plasmid containing the fluorescent reporter (pSJR036) is described in [32]. Af-  
98 ter construction, the MEK707 and MEK2324 strains were checked by PCR amplification of the insertion (see Supp.

99 Table 1). The *recB1080* mutation was introduced into the *recB-HaloTag* strain to create the *recB1080-HaloTag* strain  
 100 (MEK716). This was achieved through plasmid-mediated gene replacement using a plasmid derived from pTOF24,  
 101 pDL4174 [33]. The *recB1080* fragment was generated by PCR with the primers listed in Supplementary Table 1. A  
 102 digestion site, HaeIII, was incorporated into the *recB1080* fragment to facilitate PCR verification of successful con-  
 103 struction. Subsequently, the *recB1080* fragment was ligated into a pTOF24 backbone after the plasmid was digested  
 104 at the PstI and SalI sites, resulting in pDL4174. After construction, MEK 716 was checked by restriction-digestion  
 105 with HaeIII enzyme and PCR amplification.

The nucleotide sequences used are listed in Supplementary Table 1.

| Name                    | Characteristics                                                | Reference                                   |
|-------------------------|----------------------------------------------------------------|---------------------------------------------|
| <b>Bacterial Strain</b> |                                                                |                                             |
| MG1655                  | <i>F-lambda-rph-1</i>                                          | Lab stock                                   |
| MEK65                   | MG1655,<br><i>recB::halotag</i>                                | [7]                                         |
| MEK445                  | MG1655,<br><i>HK022::psfiA-GFP</i>                             | [32]                                        |
| MEK707                  | MG1655,<br><i>recB::halotag</i><br><i>HK022::psfiA-GFP</i>     | this work                                   |
| MEK716                  | MG1655,<br><i>recB1080::halotag</i>                            | this work                                   |
| DL654                   | MG1655, <i>recA::CmR</i>                                       | [34]                                        |
| MEK1326                 | MG1655, $\Delta recB$                                          | [8]                                         |
| MEK2324                 | MG1655,<br><i>recB1080::halotag</i><br><i>HK022::psfiA-GFP</i> | this work                                   |
| <b>Plasmids</b>         |                                                                |                                             |
| pSJR036                 | <i>PsulA-mGFP</i> in-<br>sertion by Clone<br>integration       | [32]                                        |
| pDL4174                 | pTOF with <i>recB1080</i>                                      | this work,<br>gift from<br>the Leach<br>Lab |

Table 1: List of strains and plasmids used in this work.

106

## 107 2.2 Antibiotic susceptibility tests

108 Antibiotic susceptibility tests were conducted by cultivating the relevant bacterial strains (MG1655, MEK65, MEK707,  
 109 MEK716, MEK2324, MEK1326, DL654) overnight in LB media at 37°C. From the overnight cultures, serial dilu-  
 110 tions were prepared with a dilution factor of  $10^{-5}$  starting from  $OD_{600} = 1$ , and each strain was subsequently plated  
 111 using a 42-pinner onto LB agar plates containing varying concentrations of ciprofloxacin (0, 4, 10, 14, 16, 20 ng/ml).  
 112 These plates were then incubated overnight at 37°C (see Supp. Figure 8).

## 113 **2.3 Culture conditions and Halo Labelling**

114 For all microscopy-based experiments, cells were grown in M9 supplemented with 0.2% (w/v) of glucose, 2 mM  
115 MgSO<sub>4</sub>, 0.1 mM CaCl<sub>2</sub>, 1 × MEM Essential and MEM Non-Essential Amino Acids (Gibco®). For single-molecule  
116 labelling, we used the labelling protocol presented in [7] without the chemical fixation step. In brief, bacterial  
117 cultures from frozen -80°C stocks were grown with shaking (150 rpm) in the culture medium overnight (14-16  
118 hours) at 37°C. The overnight cultures were diluted (1:300) into 15 ml of medium and grown at 37°C to the mid-  
119 exponential phase (optical density OD<sub>600</sub> = 0.2–0.3). A volume of cells equivalent to 1 mL at OD<sub>600</sub> = 0.2 was  
120 centrifuged and re-suspended in 1ml fresh medium supplemented with JF549 (Janelia Fluor®HaloTag®Ligands,  
121 Promega) at a final concentration of 1 μM. The culture was further incubated for 1 hour at 37°C with shaking. After  
122 the labelling step, each sample was centrifuged for 3 min at 8000 rpm and the pellet was resuspended in 0.5–1 ml  
123 of the M9-based medium (dye-free). This washing step was repeated 3–4 times. At each step, cells were transferred  
124 to a new tube to facilitate the removal of the dye. After the last washing step, 2–2.5 μl of bacteria were added to an  
125 agar pad containing 2% agarose dissolved in M9 media.

126 To induce DNA damage, ciprofloxacin at the chosen concentration (4, 10 or 14 ng/ml) was added to the bacterial  
127 culture 150 min before microscopy. The same concentration was maintained in the agar pad during microscopy.

### 128 **2.3.1 SYTOX labelling**

129 The bacterial nucleoid of the *recB-HaloTag* strain MEK65, which does not carry the GFP SOS reporter, was labelled  
130 using SYTOX green (Invitrogen) [35]. During the Halo labelling protocol, 500 nM of SYTOX green was added  
131 40–45 min before the beginning of the washing step.

## 132 **2.4 Microscopy set-up**

133 Imaging was performed using an inverted microscope (Nikon Ti-E) equipped with an EMCCD Camera (iXion Ultra  
134 897, Andor), a 100X TIRF Nikon objective (NA 1.49, oil immersion) and a 1.5X Nikon magnification lens (pixel  
135 size = 107 nm). Images were acquired via MetaMorph®(Molecular Devices; v7.8.13.0) in HILO (Highly Inclined  
136 Laminar Optical sheet) [36] configuration. The HILO configuration was established using the iLas® variable angle  
137 TIRF control window.

## 138 **2.5 Real-time DNA repair imaging**

139 Fluorescence excitation was performed using 561 nm and 488 nm lasers (Coherent OBIS) and detected via a dual-  
140 wavelength dichroic filter (488/561 nm) (TRF59904, Chroma). This configuration was used to stimulate the flu-  
141 orescent emissions from RecBHaloTag-JF549 and the fluorescent signal emitted by *PsulA-GFP* reporter. Movies  
142 were acquired with continuous laser excitation at 561 nm at ~ 15mW with an exposure time of 12 ms for a total  
143 acquisition time of 7 sec (600 frames). The camera's electron-multiplying (EM) gain was set to 300, and the region

144 of interest (ROI) was set to 256x256 pixels. A snapshot of the same ROI was acquired to image SOS induction by  
145 exciting the GFP signal with a 488 nm laser at  $\sim 6$  mW for 80 ms (camera EM gain 50). For each ROI, bright-field  
146 z-stacks of 16 images were acquired around the focus (total distance 3  $\mu\text{m}$ , each step of 0.2  $\mu\text{m}$ ). Each bright-field  
147 image was acquired with 30 ms of exposure time and an EM camera gain of 4. When nucleoid images were acquired  
148 instead of the SOS induction signal, the SYTOX green GFP signal was excited with the 488 nm laser at  $\sim 6$  mW for  
149 30 ms (camera EM gain 4). Each sample was imaged for a maximum time of 40-45 min. All the acquisitions were  
150 performed at 37°C in an Okolab microscope cage incubator equipped with dark panels.

### 151 **2.5.1 Cell segmentation**

152 Cell segmentation was performed from bright-field images in BACMMAN [37], an ImageJ plug-in for high-throughput  
153 image analysis and manual curation. Bright-field images were first imported into BACMMAN as a “Dataset”. The  
154 “pre-processing” step was then applied, which consisted of a single step that cropped the 16-image bright-field z-  
155 stack to 5 images on one side of the focus, as required by our cell segmentation algorithm. In the next step of  
156 the pipeline (the “processing” step), cells were segmented using Talissman, a U-net-based segmentation algorithm  
157 (<https://github.com/jeanollion/TaLiSSman>). In brief, the U-net model predicts an Euclidean distance map, where the  
158 value of each pixel is its predicted distance to the nearest background pixel. A watershed algorithm is then applied  
159 to retrieve cell contours. This approach allowed us to accurately segment cells from bright-field images, including  
160 when they formed tight clusters. Following segmentation, post-filters were applied to dilate the segmented regions  
161 slightly (to make sure we would not miss any fluorescent spots located near the edge of the cell during single-particle  
162 tracking) and to remove any cells that were in contact with the edge of the image and might therefore be cropped.  
163 The resulting segmentation masks were finally exported in hdf5 format and imported to MATLAB to resolve cells  
164 during single-particle tracking.

### 165 **2.5.2 Nucleoid detection**

166 SYTOX green fluorescence images were analysed in BACMMAN. First, a deep-learning-based denoising algorithm  
167 [38] was applied. Individual nucleoids were then segmented using a watershed algorithm on the maximum eigen-  
168 values of the Hessian transform of the image. This approach allows precise segmentation of large spot-like objects  
169 with variable shapes. The segmented regions were exported in hdf5 format for further processing.

### 170 **2.5.3 SOS induction signal detection and quantification**

171 After performing bacterial cell segmentation, we computed the average fluorescent signal for each segmented cell  
172 in BACMMAN. The local fluorescent background was subtracted from each pixel of the image during the “pre-  
173 processing” step using the ImageJ background subtraction method (Class: BackgroundSubtracted).



## 174 **2.6 Comparison of SOS induction in the WT and the RecBHaloTag**

175 All the data were acquired and analysed as described above, except for the data shown in Supplementary Figures  
176 1C and D, which were acquired and analysed as described below. Bacterial cells were grown in the same media  
177 described previously. Following overnight incubation, bacterial cultures were diluted (1:1000) into 15 ml of the  
178 medium and grown at 37°C until the OD<sub>600</sub> reached 0.4. Ciprofloxacin was added when necessary at a concentration  
179 of 10 ng/ml, and the incubation continued for a total of 150 minutes. Samples were imaged on M9-based agar pads  
180 consisting of 2% agarose.

### 181 **2.6.1 Fluorescent signal acquisition**

182 Images were acquired on the same microscope set-up described above. The GFP signal was excited with a SpectraX  
183 Line engine (Lumencor) and a Fluorescein Isothiocyanate Filter (FITC). The exposure time was 200 ms and the  
184 camera EM gain was 4. To identify cells within the region of interest (ROI), we obtained 7 bright-field z-stack  
185 images around the focal point, covering a total distance of 1.5  $\mu\text{m}$ , with each step being 0.2  $\mu\text{m}$ .

### 186 **2.6.2 Image analysis**

187 Bright-field z-stack and fluorescent images were analysed using the pipeline presented in [32]. In brief, bacterial cells  
188 in the ROI were segmented using an edge detection algorithm combined with a custom low-pass filter. The resulting  
189 cell outlines underwent manual curation to finalize the segmentation. The fluorescent signal was quantified within  
190 each cell, and the average fluorescent signal was calculated by averaging the total signal over the cell area. A local  
191 background was computed and subtracted from the average fluorescence, with the background being determined as  
192 the average fluorescent signal measured over an area located 15 pixels away from the cell border. Only bacterial  
193 cells that were at least 15 pixels away from other cells were included in the analysis, and other cells were excluded.

## 194 **2.7 Single-Particle Tracking**

195 Single-particle tracking was performed using custom-written MATLAB software (MathWorks R2021a®). Single-  
196 particle localizations were identified by applying an intensity threshold and a bandpass filter to each frame of the  
197 video. The coordinates of each intensity peak centroid were computed using a Gaussian fit. Bacterial cell segmen-  
198 tation was used to associate the computed localizations with individual bacterial cells. Trajectories were built inside  
199 each segmented bacterium. Localizations within a tracking window of 5 pixels (0.53  $\mu\text{m}$ ) in successive frames were  
200 linked together to form a trajectory. In the case of multiple localizations in the tracking window, positions whose  
201 distance resulted in the minimal total squared displacement were associated with the same track.

202 The bandpass filter, peak-finder, and tracking functions are from previously developed and published software ([http://](http://physics.georgetown.edu/matlab/)  
203 [physics.georgetown.edu/matlab/](http://physics.georgetown.edu/matlab/)) [39].

## 204 2.8 Apparent Diffusion Coefficient Calculation

205 The  $D^*$  was calculated as in [40, 41] from the Mean Square Displacement (MSD) of each trajectory divided by four  
206 times the time interval between frames, as:

$$D^* = \frac{1}{4n\Delta t} \sum_{i=1}^n [x(i\Delta t + \Delta t) - x(i\Delta t)]^2 + [y(i\Delta t + \Delta t) - y(i\Delta t)]^2 \quad (1)$$

207 where  $x(t)$  and  $y(t)$  are the trajectory's position coordinates at time  $t$ , the camera exposure time is  $\Delta t$  and  $n$  is  
208 the number of frames. Trajectories were truncated at a fixed length of  $n = 4$  frames (5 localizations) to allow the  
209 comparison of  $D^*$  values and to fit an analytical expression to describe the distribution of  $D^*$ . The localization error  
210 was also taken into account and subtracted from the  $D^*$  values [40].

### 211 2.8.1 Localization error

212 The average localization uncertainty in our experimental conditions was estimated using the Thunderstorm plugin  
213 in Fiji[42] on three representative single-particle tracking datasets. The formula used for localization uncertainty is:

$$\langle(\Delta x)^2\rangle = \frac{2\sigma^2 + a^2/12}{N} + \frac{8\pi\sigma^4b^2}{a^2N^2} \quad (2)$$

214 with  $\sigma$  the standard deviation of the fitted Gaussian in nm,  $a$  the pixel size in nm,  $N$  the number of detected photons,  
215 and  $b$  the background signal, evaluated as the residuals between the raw data and the fitted Gaussian. The obtained  
216 localization uncertainty of 28 nm was used with all datasets to compute the apparent diffusion coefficient.

## 217 2.9 $D^*$ distribution fit

218 The probability of observing an apparent diffusion coefficient  $D_i^*$  for a particle diffusing with  $D^*$  and tracked over  
219  $n$  frames, is described by the following equation, as established in [43]:

$$p(D_i^*) = \frac{1}{(n-1)!} * \left(\frac{n}{D^*}\right)^n * [(D_i^*)]^{(n-1)} * \exp\left(\frac{-nD_i^*}{D^*}\right) \quad (3)$$

220 As mentioned above, to compute  $D^*$  for each trajectory, we consider trajectories of length  $n = 4$  steps (5 localiza-  
221 tions). Therefore, to fit the  $D^*$  histogram distributions, we used the eq.3 for  $n = 4$ . For the *recB-HaloTag* strain not  
222 exposed to ciprofloxacin, we initially fit the  $D^*$  with a model describing two molecular species diffusing with  $D_1^*$   
223 and  $D_2^*$ :

$$p(D_i^*) = \frac{A}{6} * \left(\frac{4}{D_1^*}\right)^4 * [(D_i^*)]^{(3)} * \exp\left(\frac{-4D_i^*}{D_1^*}\right) + \frac{1-A}{6} * \left(\frac{4}{D_2^*}\right)^4 * [(D_i^*)]^{(3)} * \exp\left(\frac{-4D_i^*}{D_2^*}\right) \quad (4)$$



224 To describe the  $D^*$  distribution after exposure to the antibiotic, we used a model describing three different sub-  
225 populations of molecules:

$$\begin{aligned} p(D_i^*) = & \frac{A_1}{6} * \left(\frac{4}{D_1^*}\right)^4 * [(D_i^*)]^{(3)} * \exp\left(\frac{-4D_i^*}{D_1^*}\right) \\ & + \frac{A_2}{6} * \left(\frac{4}{D_2^*}\right)^4 * [(D_i^*)]^{(3)} * \exp\left(\frac{-4D_i^*}{D_2^*}\right) \\ & + \frac{1 - A_1 - A_2}{6} * \left(\frac{4}{D_3^*}\right)^4 * [(D_i^*)]^{(3)} * \exp\left(\frac{-4D_i^*}{D_1^*}\right) \end{aligned} \quad (5)$$

226 The three-sub-population fit was performed by constraining the value of the averaged  $D^*$  of the very slow fraction  
227 of trajectories to  $0.09 \mu\text{m}^2/\text{s}$ . This specific value was determined by averaging the  $D^*$  values associated with the  
228 slower sub-population, which were computed by fitting the  $D^*$  distributions of the 14 ng/ml samples using a three-  
229 sub-population model for  $D^*$ . Fits were performed using maximum likelihood estimation in MATLAB.

## 230 **2.10 Calculation of the percentage of bacteria with high SOS induction**

231 We assessed the percentage of cells exhibiting high SOS levels by considering those with SOS values exceeding  
232  $2 \times 10^2$  arbitrary units (a.u.). This threshold was chosen based on the sub-population of bacteria expressing high  
233 SOS in the *recB-HaloTag* strain that was not exposed to ciprofloxacin (see Supp. Figure 4D).

## 234 **2.11 Data and code availability**

235 The MATLAB code used to perform the data analysis can be found in the *MEKlab Gitlab*. Please contact the  
236 corresponding author for a more recent version. The data that support the findings of this study are available upon  
237 request.

# 238 **3 RESULTS**

## 239 **3.1 In vivo tracking of single RecB molecules using HaloTag labelling**

240 To understand how DNA Double Strand Breaks (DSBs) are recognized and processed by RecBCD, we measured  
241 the mobility of single RecB molecules for different levels of DNA damage. We used a previously characterized  
242 translational fusion of the HaloTag to RecB, having already established that the labelling is specific and the fusion  
243 can be used to image single RecB molecules which are functional [7].

244 To further test whether the HaloTag fusion influenced the downstream molecular processes of *E. coli* at the single-  
245 cell level, we compared the induction of the SOS response in two strains: the wild-type *E. coli* strain and the *E. coli*  
246 strain that contained the RecB-HaloTag fusion. Tests conducted at the single-cell level can detect effects that might  
247 be neglected when analysing the impact on DNA repair in *E. coli* in whole populations of bacteria [44]. We measured  
248 the cell area and evaluated the induction of the SOS response by calculating the mean GFP intensity per bacterial  
249 cell using an SOS transcriptional reporter (*PsulA-mGFP*, [32]). This analysis was performed on both the WT *recB*

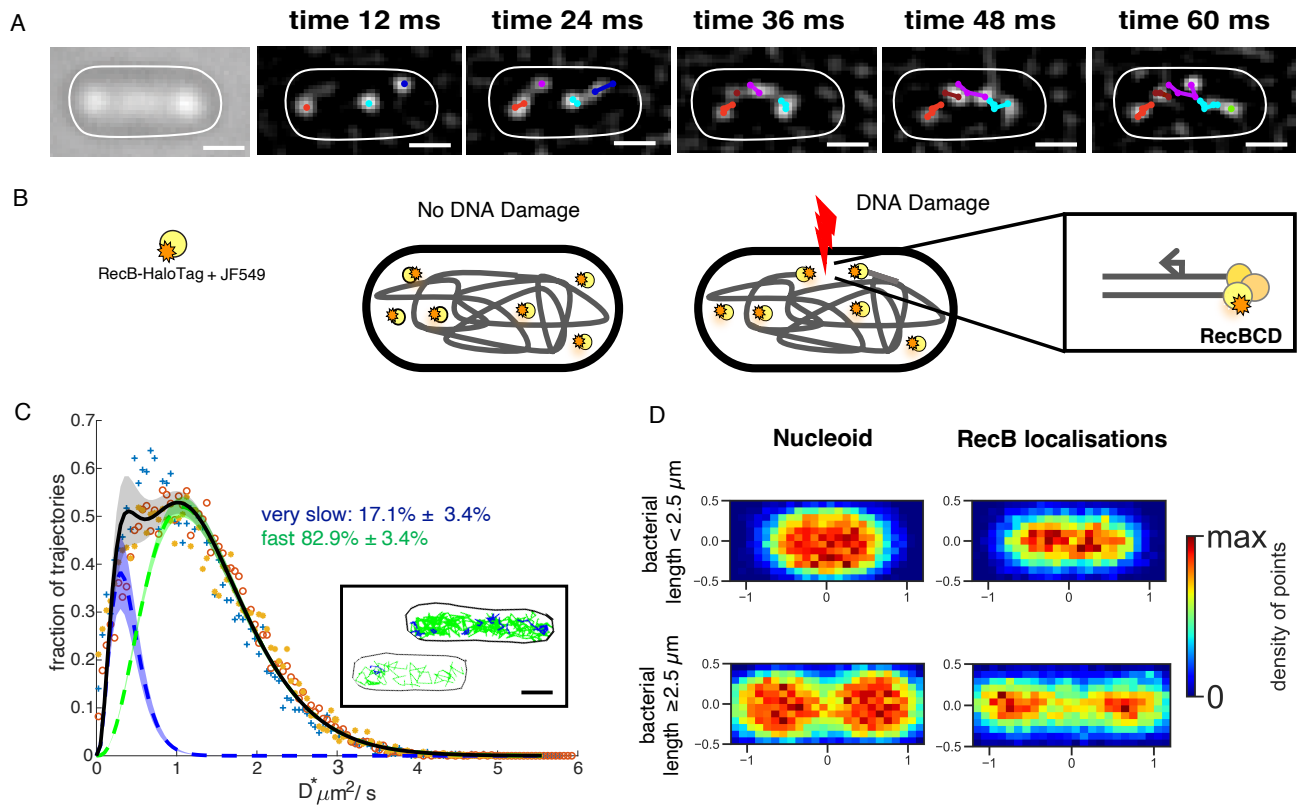

Figure 1: Single RecB molecule tracking in live bacteria. (A) Illustration of RecB single-molecule trajectories detected in a single bacterial cell for 5 consecutive frames. Left panel: bright-field. Right panels: progression of the track building overlapped on filtered images to highlight diffraction-limited spots of the frame corresponding to the indicated time (top of each panel). Scale bar  $1 \mu\text{m}$ . (B) Schematic of RecB-HaloTag mobility labeled with JF549. In the absence of DNA damage (on the left), RecB-HaloTag mainly undergoes free diffusion. Following DNA damage (on the right), RecB-HaloTag binds to DSB ends. (C) Apparent diffusion coefficients distribution,  $D^*$ , of the detected RecB single-molecule trajectories for three datasets (Total number of bacteria: 2830; Total number of tracks: 25134; dataset 1: '+' (blue), dataset 2: 'o' (red), dataset 3: '\*' (orange), see Supp. Table 2 for information on single datasets). The averaged fitted distribution describing two sub-populations of RecB trajectories with different mobility is overlapped (full black line). Dotted lines represent the averaged fitted curves, while shaded areas denote the standard deviation from the average of the fits conducted on each dataset. Fractions of trajectories described by each sub-population are indicated. Inset: representative examples of RecB detected trajectories colour-coded as the respective  $D^*$  sub-population. In blue, are the trajectories whose  $D^*$  is associated with the slower sub-population, and in green are the ones whose  $D^*$  is associated with the faster sub-population. Scale bar  $1 \mu\text{m}$ . (D) Localization maps of bacterial cells and nucleoids for cell length smaller (top panels) and equal or longer than  $2.5 \mu\text{m}$  (bottom panels), each normalized by bacterial cell length. Nucleoids  $N_{\text{cells}}=124$ ; RecB localizations  $N_{\text{cells}}=1127$ .

250 (MEK445) and *recB-HaloTag* strains (MEK707) after incubating both strains with 10 ng/ml of ciprofloxacin for 2  
 251 hours. As expected, after the exposure to ciprofloxacin, we observed an increase in the cell area and induction of  
 252 the SOS response (see Supplementary Figures 1A and 1B). The cell area and the SOS signal distributions of the  
 253 *recB-HaloTag* strain were similar to those measured for the WT *recB* (see Supplementary Figures 1C and 1D). Thus,  
 254 our data show that the HaloTag fusion does not affect the capacity of RecBCD to lead to the induction of the SOS  
 255 response, further confirming that the *RecB-HaloTag* strain can be used to study DNA DSB repair in live *E. coli*.  
 256 The HaloTag, conjugated with a synthetic dye (here JF549,[45]), enables *in vivo* tracking of rapidly diffusing pro-  
 257 teins [46]. Combined with RecB low copy number (on average  $4.9 \pm 0.3$  [7]), it allowed us to directly track single  
 258 RecB molecules without needing photoactivation imaging techniques. To estimate the mobility of a single RecB  
 259 trajectory, we computed its apparent diffusion coefficient,  $D^*$ , as previously [46, 47, 48, 49, 41].  
 260 We first computed the  $D^*$  distribution of single RecB molecules in cells not exposed to exogenous sources of DNA  
 261 damage. We initially performed a fit of the  $D^*$  histograms using an analytical expression of  $D^*$  [43] representing  
 262 one diffusing population of molecules (see Supplementary Figure 2). The value of the fitted  $D^*$  averaged over the  
 263 values computed for each of the three datasets was  $1.22 \pm 0.10 \mu\text{m}^2/\text{s}$  (Supp. Figure 2). However, we noticed that

264 the one-population fitted distributions shown in Supplementary Figure 2 failed to fully describe the underlying  $D^*$   
265 histogram, prompting us to use a two-population fit.

266 The two sub-populations fit identified a first group of RecB trajectory described by an average  $D^* = 0.40 \pm 0.02$   
267  $\mu\text{m}^2/\text{s}$  and a second one described by an average  $D^* = 1.43 \pm 0.05 \mu\text{m}^2/\text{s}$  (as above, the  $D^*$  values were averaged  
268 from fits performed on three datasets acquired in the same conditions, the error is the standard deviation, see Supple-  
269 mentary Figure 2 and Supplementary Table 3). The majority of RecB trajectories ( $82.9 \pm 3.4 \%$ , see Supplementary  
270 Table 3) showed high mobility ( $D^* = 1.43 \pm 0.05 \mu\text{m}^2/\text{s}$ ). This population of RecB trajectories likely corresponds  
271 to RecB molecules that are diffusing in the cytoplasm and do not interact with the DNA. The second population  
272 of RecB trajectories, described by the average  $D^* = 0.40 \pm 0.02 \mu\text{m}^2/\text{s}$  corresponded to  $17.1 \pm 3.4\%$  of the entire  
273 population. As observed in other DNA-interacting proteins under similar imaging conditions [41], the mobility of  
274 this fraction of RecB trajectories is too high to be attributed to molecules bound to the DNA. It is thus likely that this  
275 subset of RecB trajectories corresponds to a sub-population of molecules engaged in transient interactions with DNA  
276 as they search for their target sites. This two-population fit does not take into account very slow RecB trajectories  
277 corresponding to RecB bound to DNA in line with the low frequency of endogenous DSBs [4] (see below).

278 To verify that RecB molecules localized mainly within the bacterial nucleoid, we built a two-dimensional localiza-  
279 tion map of the detected RecB molecules for all the bacterial cells of our samples (see Figure 1D, right panel). We  
280 then used the SYTOX Green dye [35, 41](see also Material and Methods) to label and image the bacterial nucleoid.  
281 Comparing the nucleoid positions to the RecB localization distribution map (Figure 1D, left panel), we observed that,  
282 as expected, the RecB spatial distribution overlapped with the spatial distribution of the nucleoid. For larger cells  
283 where the chromosome has started to segregate prior to cell division (bacterial cells longer than  $2.5 \mu\text{m}$ ) and forms  
284 a typical bi-lobar shape, the localization of RecB molecules showed a very similar shape indicating that they likely  
285 co-localize with the bacterial nucleoid during the cell cycle (see Supplementary Figure 2H-J for more datasets).

### 286 **3.2 RecB mobility decreases with a high level of induced DNA damage**

287 To investigate how different levels of DNA damage could impact the repair process and RecB mobility, we treated  
288 bacterial cells with sub-lethal concentrations of ciprofloxacin. We aimed to identify concentrations of ciprofloxacin  
289 that would induce the SOS response without leading to cell death. We used spot test assays across a range of  
290 ciprofloxacin concentrations from 0 to 20 ng/ml (see Materials and Methods and Supp. Figure 3). We chose 4 ng/ml  
291 and 14 ng/ml for the following reasons: at 4 ng/ml, low-level DNA damage is produced but viability is not affected  
292 (see Supp. Figure 3); at 14 ng/ml, the level of DNA damage is higher but the spot tests showed a limited reduction  
293 in cell viability (see Supp. Figure 3), thus allowing us to observe the repair process. We quantified the average  
294 GFP signal per bacterial cell from the SOS fluorescent reporter *PsulA-mGFP* at the single cell level and measured  
295 the cell area in these conditions. Bacteria were exposed to each concentration of ciprofloxacin for 150 minutes  
296 before starting microscopy and the same antibiotic concentration was maintained on the agar pad, thus ensuring that

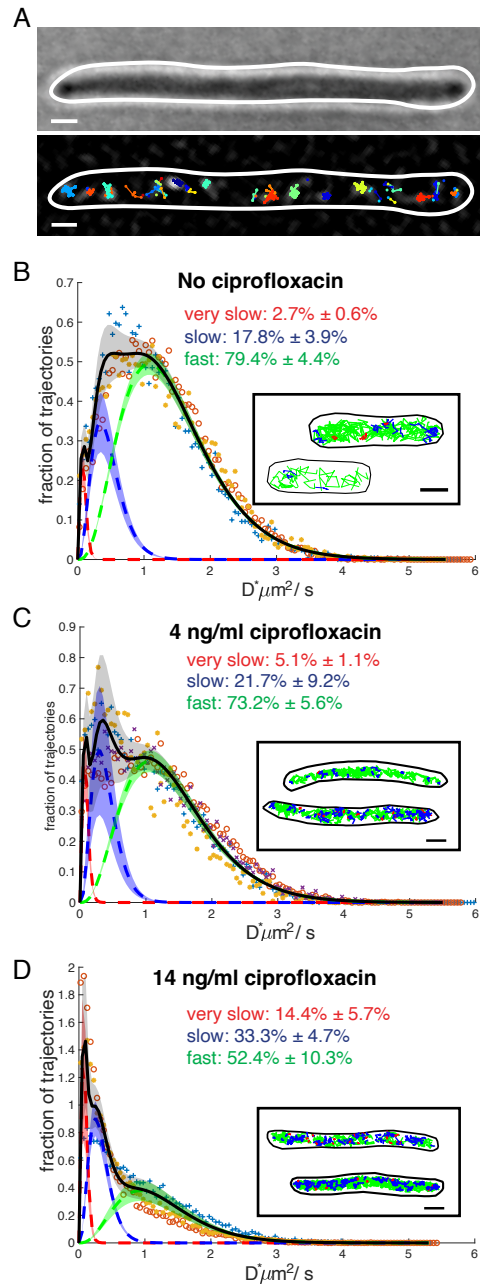

Figure 2: RecB mobility decreases with a high level of DNA damage. (A) Representative example of RecB trajectories detected in a cell exposed to 14 ng/ml of ciprofloxacin. Top panel: bright-field. Bottom panel: detected trajectories overlapped on one filtered image. Scale bar 1  $\mu\text{m}$ . (B) Apparent diffusion coefficient distributions,  $D^*$ , for samples exposed to 0 (same datasets shown in Figure 1 here fitted with a three sub-populations model, dataset 1: '+' (blue), dataset 2: 'o' (red), dataset 3: '\*' (orange)), (C) 4 (dataset 1: '+' (blue), dataset 2: 'o' (red), dataset 3: '\*' (orange), dataset 4: 'x' (purple), ) and (D) 14 ng/ml (dataset 1: '+' (blue), dataset 2: 'o' (red), dataset 3: '\*' (orange)) of ciprofloxacin. Histograms were fitted with a three-species model (full black line) corresponding to three sub-populations of very slow (dotted red line), slow (dotted blue line) and fast (dotted green line) moving RecB molecules. Dotted lines are averaged fitted values and shadow areas represent the standard deviation computed from the datasets acquired in each condition. Fractions of trajectories described by each sub-population are indicated. Insets: representative examples of RecB detected trajectories for the corresponding condition, colour-coded as the respective  $D^*$  sub-population. In red the trajectories described by  $D^*_{\text{very slow}}$ ; in blue the trajectories described by  $D^*_{\text{slow}}$ , in green the trajectories described by  $D^*_{\text{fast}}$ . Scale bar 1  $\mu\text{m}$

297 the cells reached a “steady-state” of DNA damage exposure. We verified that the two concentrations we selected  
298 together with the control represented three distinct levels of SOS induction: no induction except for a few cells  
299 (corresponding to endogenous damage) without ciprofloxacin and a low and high level respectively for 4 and 14  
300 ng/ml (Supp. Figure 4D).

301 We performed RecB single-molecule tracking under ciprofloxacin exposure. As expected, following ciprofloxacin  
302 treatment, the bacterial cells appeared elongated (Supp. Figures 4A, 4C), and we observed that the detected RecB  
303 trajectories (Figure 2A) explored a smaller space compared to the condition without ciprofloxacin (Figure 1A). This  
304 suggests that some RecB molecules were recruited to the DNA and hence appeared much less mobile.

305 The  $D^*$  distributions for 4 and 14 ng/ml (Figures 2C and D) showed a clear shift toward values of  $D^*$  smaller than  
306  $1 \mu\text{m}^2/\text{s}$  in comparison to the  $D^*$  distribution computed for the no ciprofloxacin sample. We also noticed a peak  
307 (more evident in the 14 ng/ml of ciprofloxacin condition) in the  $D^*$  distribution for  $D^*$  values lower than  $\sim 0.10$   
308  $\mu\text{m}^2/\text{s}$  (Figures 2D and 2C). Similar values of  $D^*$  have been previously associated with molecules bound to the  
309 DNA[40, 48, 50, 41]. We therefore fitted the  $D^*$  histograms of trajectories obtained in the presence of 14 ng/ml  
310 ciprofloxacin with an analytical expression of  $D^*$  containing a third, additional sub-population of RecB trajectories  
311 (See Figure 2, Supp. Figure 5 and Supp. Table 4). The fit was performed by constraining the value of the averaged  
312  $D^*$  of the very slow fraction of trajectories to  $0.09 \mu\text{m}^2/\text{s}$  (see Materials and Methods). The fit provided an estimate  
313 for the relative proportions of each sub-population of RecB trajectories:  $14.4 \pm 5.7 \%$  of the detected trajectories  
314 were “very slow”;  $33.3 \pm 4.7 \%$  were “slow” ( $D^*_{\text{slow}} = 0.33 \pm 0.02 \mu\text{m}^2/\text{s}$ ) and the remaining  $52.4 \pm 10.3 \%$  were  
315 “fast” ( $D^*_{\text{fast}} = 1.24 \pm 0.07 \mu\text{m}^2/\text{s}$ ). To quantify how the relative fraction of RecB trajectories in the sub-populations  
316 changed for the different levels of DNA damage, we performed the same fit for the  $D^*$  distribution computed for  
317 the bacteria exposed to no and 4 ng/ml of ciprofloxacin (See Supp. Table 4 and Supp. Figure 5 for single datasets).

318 We observed that the fraction of trajectories corresponding to  $D^*_{\text{veryslow}}$  progressively increased with the level of  
319 DNA damage from  $2.7 \pm 0.6 \%$  without ciprofloxacin to  $5.1 \pm 1.1 \%$  at 4 ng/ml of ciprofloxacin to reach  $14.4 \pm$   
320  $5.7 \%$  at 14 ng/ml of ciprofloxacin. The fraction of RecB trajectories corresponding to the fast sub-population did  
321 not vary significantly between 0 and 4 ng/ml of ciprofloxacin with values between  $79.4 \pm 4.3 \%$  and  $73.2 \pm 5.6$   
322  $\%$  respectively, but it decreased for the highest level of DNA damage to  $52.4 \pm 10.3\%$  ( see Supp. Figure 5 and  
323 Supp. Table 3). The reduction in the fraction of fast-non-DNA interacting molecules for the higher concentration  
324 of ciprofloxacin was consistent with an increase of RecB molecules engaged in the repair process. Taken together,  
325 these results suggest RecB mobility experiences small variations at lower concentrations of ciprofloxacin, whereas  
326 it is significantly affected at a high ciprofloxacin concentration. This reflects the expected increase in the number of  
327 DSBs correlated with increasing ciprofloxacin concentrations.

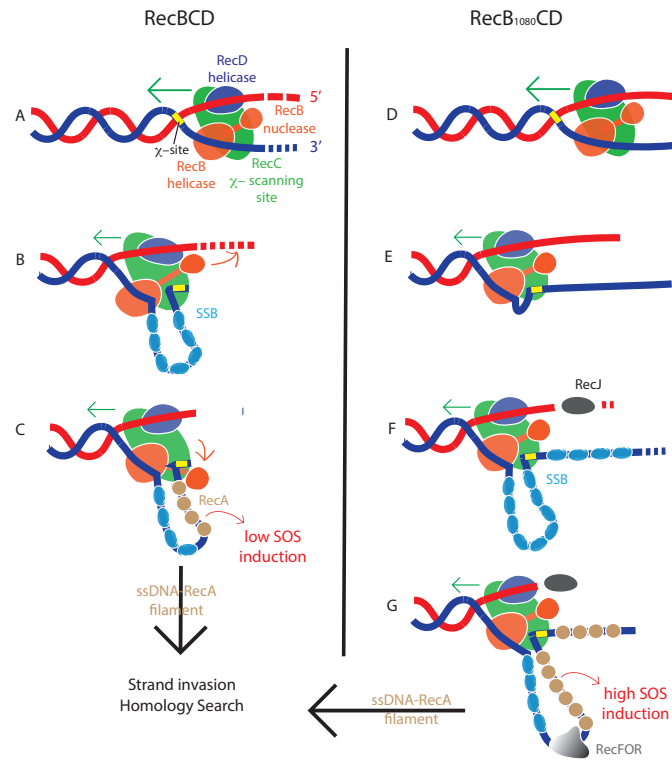

Figure 3: Schematics of the repair pathways leading to RecA loading on ssDNA, based on the models presented in [15, 18, 23]. (A) RecBCD (left) translocates on DNA while degrading it. (B) After  $\chi$ -site recognition, RecBCD changes its biochemical activity. It pauses and then restarts translocation at a reduced rate; since the  $\chi$  sequence is bound to the RecC subunit the 3' end exit is blocked. As a result, a loop of ssDNA is accumulated upstream of the  $\chi$ -site and it is rapidly covered by the SSB protein. The 5' is cleaved more rapidly by the RecB nuclease. (C) The RecB nuclease domain promotes the recruitment of the RecA protein to the ssDNA, leading to RecA filament formation. Then, the RecA-ssDNA performs the homology search. (D) RecB1080CD (right) translocates on the dsDNA but does not degrade it; (E) RecB1080CD recognizes the  $\chi$ -site but does not promote RecA loading. It pauses and possibly undergoes translocation at a reduced rate. Similarly to RecBCD, a loop starts to form upstream of the  $\chi$ -site. (F) The 3' ssDNA is covered by SSB. The 5' end is degraded by RecJ. Other exonucleases, such as ExoVI [51], could partially degrade the 3' ssDNA. (G) Since RecB1080 lacks nuclease activity, it cannot promote RecA loading, and its continued translocation on the ssDNA could result in a longer 3' end ssDNA. RecA loading is facilitated by RecFOR. After the RecA-ssDNA filament is formed, it performs strand invasion and homology search.

### 3.3 RecB nuclease inactivation affects DSB repair

To investigate how DSBs are processed when the RecBCD-dependent repair pathway is affected, we chose to observe RecB activity and SOS induction in the presence of a mutated RecB protein, RecB1080. This protein carries a single point mutation in the putative  $Mg^{2+}$  binding site of the RecB subunit (Asp-1080  $\rightarrow$  Ala), which inactivates the RecB nuclease domain [21, 22]. Biochemical analysis of RecB1080CD shows that the complex still recognises  $\chi$  sites but does not promote RecA loading [22]. Hence, it is not able to complete DSB repair through the usual RecBCD-dependent RecA loading pathway although it is still partially functional since the helicase activities are not affected. To study this mutant at the single-molecule level, we constructed a HaloTag fusion to the mutated RecB subunit and introduced the SOS transcriptional reporter *Psula-mGFP* into the mutant chromosome (MEK2324), as previously performed for the *recB-HaloTag* strain. Characterization of this strain (referred to as the *recB1080-HaloTag* mutant) showed normal viability (Supp. Figure 6A and Supp. Figure 8). Survival after exposure to various concentrations of ciprofloxacin (4, 14 ng/ml, see Supp. Figure 6A), whilst reduced compared to WT, was much higher than in a  $\Delta recB$  strain. This is similar to previous results obtained after exposure to gamma irradiation [23] and suggests that the *recB1080-HaloTag* mutant is able to repair DSBs by loading RecA through another, less efficient, pathway



342 (described in Figure 3, [23]). Hence, this mutant allowed us to measure the efficiency of DNA repair when the  
343 main RecA loading pathway is inactivated without confounding factors linked to the low viability of most *recBCD*  
344 mutants.

345 We first checked the induction of the SOS response in the *recB1080-HaloTag* mutant, using our SOS fluorescent  
346 reporter *PsuIA-mGFP* and compared it to the *recB-HaloTag* strain. Interestingly, without ciprofloxacin, the SOS  
347 signal distribution in the *recB1080-HaloTag* mutant was very different than in the *recB-HaloTag* strain (Figure 4A  
348 and Supp. Figures 4A, 4B, 7A and 7B): in the mutant, a large number of cells had induced a detectable level of SOS.  
349 Given that both strains are expected to incur the same amount of DSBs (as RecB has no role in DSB formation), this  
350 result suggests that WT RecB repairs most endogenous damage very efficiently without inducing the SOS response  
351 but that the alternative pathway for RecA loading used in the *recB1080-HaloTag* strain leads to less efficient repair  
352 and a higher number of cells inducing SOS as a result. After 150 minutes of exposure to a ciprofloxacin concentration  
353 of 4 ng/ml, both the *recB1080-HaloTag* and the *recB-HaloTag* strains had reached approximately the same level of  
354 SOS expression suggesting that whilst the repair pathway is affected in the *recB1080-HaloTag* mutant, this strain is  
355 still able to induce the DNA damage response upon exposure to exogenous damage.

356 To further characterize the *in vivo* activity of RecB1080-HaloTag, we performed tracking of single RecB1080-  
357 HaloTag molecules. Without ciprofloxacin, the  $D^*$  distribution of RecB1080-HaloTag was dramatically different  
358 from the one observed in the same condition for the RecB-HaloTag strain. Indeed, the fraction of very slow ( $D^* =$   
359  $0.09 \mu\text{m}^2/\text{s}$ ) RecB1080-HaloTag molecules was  $14.5 \pm 2.5 \%$ , 5 - 6 times larger than for RecB-HaloTag with  $2.7 \pm$   
360  $0.6 \%$  (Figures 4B and 2B, and Supp. Tables 6 and 4). The fraction of slow RecB1080-HaloTag molecules ( $D^* = 0.34$   
361  $\pm 0.2 \mu\text{m}^2/\text{s}$ ) was  $34.2 \pm 4.9 \%$  and the third population of fast RecB1080-HaloTag molecules ( $D^* = 1.33 \pm 0.03$   
362  $\mu\text{m}^2/\text{s}$ ) was  $51.3 \pm 6.5 \%$ . Given that the number of DSB per chromosome is not expected to change in the mutant,  
363 the higher fraction of very slow RecB1080 molecules suggests that RecB1080 molecules stay bound to DNA ends  
364 for a longer time than the WT RecB, resulting in a shift in the proportion of different types of molecule mobility.

365 After exposure to 4 ng/ml of ciprofloxacin, we observed that the fraction of very slow RecB1080-HaloTag molecules  
366 increased to  $17 \pm 1 \%$  from  $14.5 \pm 2.5 \%$ . The fraction of slow RecB molecules ( $D^* = 0.32 \mu\text{m}^2/\text{s}$ ) was  $39.2 \pm$   
367  $2.4 \%$  and the third population of fast RecB molecules ( $D^* = 1.15 \pm 0.05 \mu\text{m}^2/\text{s}$ ) was  $44.0 \pm 3.5 \%$  (Figure 4C).  
368 The increase in the proportion of very slow molecules is similar to what is observed in WT-RecB cells at this  
369 concentration and is consistent with the low levels of DNA damage caused by this concentration of ciprofloxacin.  
370 This suggests that the amount of exogenous DNA damage induced in *recB1080* is likely to be similar to the one  
371 induced in the WT.

372 To further compare the repair pathways in the *recB-HaloTag* and *recB1080-HaloTag* strains, we analysed the  
373 data on an individual cell basis. We calculated the proportion of cells with at least one very slow RecB in each strain  
374 as well as the proportion of cells that had strongly induced SOS (Table 2). For endogenous DNA damage, in the  
375 *recB-HaloTag* strain, approximately 12% of cells showed at least one RecB bound to DNA but only 2.7% of the

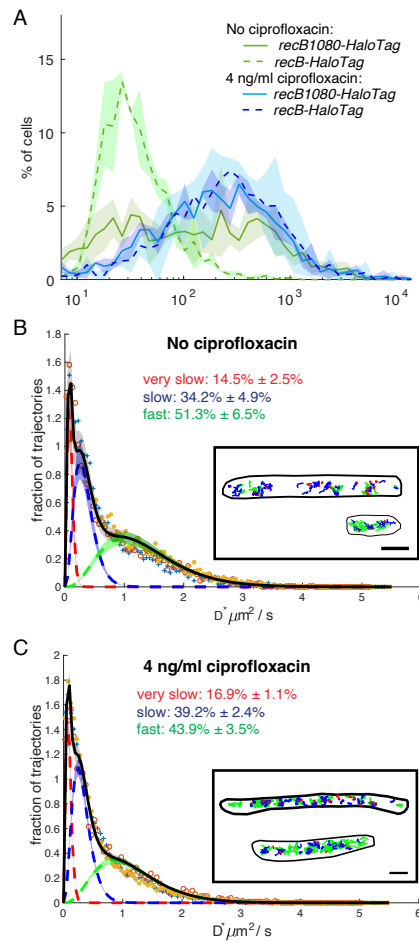

Figure 4: The DNA repair dynamics is altered in *recB1080-HaloTag* mutant. (A) In *recB1080-HaloTag* a large fraction of cells induce SOS. Full lines represent the average computed over three datasets, shaded areas represent the standard deviation; (B) Apparent diffusion coefficient distributions,  $D^*$ , for samples treated with no ciprofloxacin (Total number of bacteria: 1232; Total number of tracks: 16444; dataset 1: '+' (blue), dataset 2: 'o' (red), dataset 3: '\*' (orange), see Supp. Table 5 for information on single datasets) and (C) 4 ng/ml of ciprofloxacin (Total number of bacteria: 1132; Total number of tracks: 26861; dataset 1: '+' (blue), dataset 2: 'o' (red), dataset 3: '\*' (orange), see Supp. Table 5 for information on single datasets). The averaged fitted distribution describing three sub-populations of RecB trajectories with different mobility is overlapped (full black line). Dotted lines are averaged fitted values and shadow areas represent the standard deviation computed from the datasets acquired in each condition. Fractions of trajectories described by each sub-population are indicated. Insets: representative examples of RecB1080 detected trajectories for the corresponding condition, colour-coded as the respective  $D^*$  sub-population. In red, trajectories corresponding to  $D^*_{very\ slow}$ ; in blue trajectories corresponding to  $D^*_{slow}$ , in green, trajectories corresponding to  $D^*_{fast}$ . Scale bar  $1\mu\text{m}$

376 cells had induced high SOS levels, suggesting that DNA repair is efficient and rarely leads to full SOS induction. In  
 377 contrast, in the *recB1080-HaloTag* mutant, the proportion of cells with at least one DNA-bound RecB was very high  
 378 (46.6%) with a similarly high number of cells that had induced SOS. This high proportion of cells with DNA-bound  
 379 RecB1080 is likely due to a combination of two phenomena: firstly, as shown above, RecB1080 seems to stay bound  
 380 to DNA for a longer time than WT RecB. Secondly, as an induced SOS state results in a larger cell volume and  
 381 more DNA per cell, this could lead to a larger number of DSBs per cell. Upon exposure to ciprofloxacin, there was  
 382 a simultaneous rise in both the proportion of cells with RecB bound to DNA and exhibiting high SOS induction as  
 383 expected. Taken together, these results suggest that the dynamics of the SOS induction and the repair time scale in  
 384 the *recB1080-HaloTag* is altered compared to the WT *recB-HaloTag* strain.

| Strain                  | Ciprofloxacin (ng/ml) | RecB on the DNA substrate (% of bacteria) | High SOS induction (% of bacteria) |
|-------------------------|-----------------------|-------------------------------------------|------------------------------------|
| <i>recB-HaloTag</i>     | 0                     | 12.3 ± 2.8                                | 2.8 ± 0.4                          |
|                         | 4                     | 28.8 ± 9.0.                               | 59.5 ± 13.8                        |
| <i>recB1080-HaloTag</i> | 0                     | 46.6 ± 12.4                               | 38.6 ± 10.7                        |
|                         | 4                     | 67.5 ± 14.2                               | 50.8 ± 3.2                         |

Table 2: Percentage of bacteria with RecB on the DNA and high SOS induction for the *recB-HaloTag* and *recB1080-HaloTag* strains.

## 385 4 DISCUSSION

### 386 4.1 The three sub-populations of RecB molecules correspond to different modes of interaction with 387 DNA.

388 In this work, we used single-molecule tracking in live *E. coli* to achieve a quantitative understanding of the initial  
389 steps of DSB repair *in vivo*. We observed that RecB mobility patterns change depending on its engagement in the  
390 repair process and that more RecB molecules are recruited on DNA as the level of DNA damage increases.

391 Our data show that RecB binding to DNA correlates with the presence of DNA double-strand ends. When bacteria  
392 experience solely endogenous DNA damage, approximately 2.7% of RecB trajectories are very slow, likely corre-  
393 sponding to RecB bound to the DNA. We also observed that approximately 20% of RecB trajectories (see Figure 2B  
394 and Supp. Table 4) are slow, suggesting transient interactions with DNA, probably corresponding to RecB molecules  
395 engaged in target search, with the rest freely diffusing in the cytoplasm.

396 Exposure to exogenous DNA damage results in a critical change in the distribution of RecB interactions with  
397 its substrate: a significant proportion of RecB molecules display very slow mobility corresponding most likely to  
398 DNA-bound molecules, and the fraction of RecB not involved in the repair process decreases as more molecules bind  
399 to DSBs. Our observations are compatible with previous studies of the mobility of DNA repair enzymes such as  
400 PolII, LigA, and MutS [40, 50]. All these enzymes bind to damaged DNA, and exhibit a comparatively low fraction  
401 of molecules bound to DNA in normal conditions and an increase upon exposure to DNA damage. Similarly, recent  
402 work investigating RecB dynamics after exposure to mitomycin C showed an increase of molecules with very low  
403 mobility after DNA damage (Figure 4 in [30]).

404 Our observations are based on tracking the RecB subunit, most likely as part of the RecBC or RecBCD complexes  
405 which are both known to interact with DNA[52, 15, 3, 53]. Despite their distinct biochemical activities, it is not  
406 possible to distinguish them precisely via single-molecule tracking. Their apparent diffusion coefficients, when  
407 non-interacting with DNA, are expected to be nearly indistinguishable due to their high molecular weights (MW  
408 RecBC: 263 kDa; MW RecBCD: 330 kDa)[54, 41]. Although RecBCD initiates repair from blunt ends much more  
409 efficiently than RecBC [55] they both robustly interact with DNA ends [53] making differentiation of the complexes  
410 challenging. It is also possible that we may have detected un-complexed individual RecB subunits. We believe  
411 these would represent only a small number of the molecules because RecB forms a tight complex with RecC [15].

412 Moreover, their impact is likely confined to the fast fraction of the trajectories, as RecB alone lacks robust DNA  
413 binding activities[56], in contrast to RecBC and RecBCD.

## 414 **4.2 In the *recB1080* mutant, DSB repair dynamics differ from the WT**

415 Combining RecB single-molecule tracking and the measurement of SOS induction in individual cells highlights  
416 key differences between the normal repair pathway and the alternative RecA loading mechanisms in the *recB1080*  
417 mutant. When WT RecB is produced, the repair of endogenous damage occurs efficiently without triggering a high  
418 SOS response. We observe 12% of the cells with a DNA-bound RecB molecule (see Table 2), suggesting that they  
419 are undergoing DNA repair, most likely from replication fork collapse [57]. In these conditions, it is likely that  
420 a homologous copy of the chromosome is close by, probably enabling efficient repair, with a short ssDNA-RecA  
421 filament, which does not lead to a high SOS response (Figure 3C). Indeed, the lifetime of RecA structures has been  
422 reported to be proportional to the induced SOS response [28].

423 In the *recB1080-HaloTag*, nearly 40% of bacterial cells have induced high levels of SOS, approximately 20 times  
424 more than observed in the *recBHaloTag* strain (see Table 2) and similar to the proportion of bacterial cells that have  
425 at least one DNA bound RecB1080. This suggests that RecB1080 binding to the DNA mainly results in high SOS in-  
426 duction. Indeed, our results indicate that RecB1080 likely remains bound to the DNA for a longer time than RecB. It  
427 is possible that the lack of direct interaction with RecA as a result of the mutation in the nuclease domain [18, 19, 20]  
428 affects RecB dissociation process. Moreover, as illustrated in Figure 3G, in the absence of its exonuclease activity,  
429 RecB1080 fails to degrade the 3' DNA overhang before  $\chi$  recognition. The longer translocation combined with the  
430 lack of DNA degradation would result in a longer 3' end and a potentially longer ssDNA-RecA filament, leading to  
431 high SOS induction.

432 Surprisingly, when cells are exposed to a ciprofloxacin concentration of 4 ng/ml for 150 minutes, the percentage of  
433 bacterial cells with high SOS induction in the *recB1080-HaloTag* mutants is not higher than that in the *recBHaloTag*  
434 strain. This could be explained if loading of RecA using the alternative pathway requires more time in the *recB1080-*  
435 *HaloTag* mutant compared to the *recBHaloTag* strain. Consequently, complete SOS induction might not have been  
436 achieved within our observation time window. This is consistent with previous population-based measurements of  
437 SOS induction [23] which reported slower SOS induction in a *recB1080* mutant.

438

## 439 **5 CONCLUSIONS**

440 Our observations contribute to the *in vivo* understanding of DNA DSB repair, providing valuable insights into the  
441 interaction between the RecBCD complex and DNA, as well as its ability to respond to varying levels of DNA dam-  
442 age. Our data concerning the *recB1080* mutant confirm the hypothesis that an alternative repair pathway is activated  
443 when RecB lacks its nuclease activity. By introducing a point mutation in the RecB nuclease domain to inactivate its

444 exonuclease activity, we were able to understand how a relatively limited perturbation in RecBCD activities affects  
445 repair efficiency. Our results highlight the importance of the coordinated action of RecBCD helicases and nucleases,  
446 along with RecA loading, in achieving rapid and efficient repair. Moreover, such an experimental approach, using  
447 minimal, targeted perturbation of a highly coordinated process, could be used to probe other fundamental biological  
448 processes *in vivo*.

## 449 **6 Acknowledgements**

450 We wish to thank Joseph Zamith for his contribution to data acquisition. We are deeply grateful to David Leach and  
451 Elise Darmon for generously providing the plasmid to construct the *recB1080* strain and for engaging in insightful  
452 discussions. We would also like to express our gratitude to Mark Dillingham for sharing his expertise on RecBCD  
453 and we are thankful to Hafez El Sayyed for actively participating in the discussion of our results. This work has  
454 been supported by Wellcome Trust Investigator Awards (Grant No. 205008/Z/16/Z awarded to M.E.K. and Grant  
455 No. 110164/Z/15/Z awarded to A.N.K.), a BBSRC BB/S008012/1 responsive mode award (to A.N.K. and M.E.K.),  
456 and a Marie Skłodowska-Curie Personal Fellowship (Grant No. 101063725-BARTAS) awarded to A.L.

## 457 **7 Authors Contributions**

458 M.E.K., A.L. and A.N.K. conceived the experiments. M.E.K., A.N.K., A.L., D.T. and O.J.P. designed the data  
459 analysis. A.L., B.A. and L.McL. built the strains. A.L. and D.T. collected and analysed the data. M.E.K, A.L., D.T.,  
460 A.N.K. and O.J.P. discussed the data. A.L. wrote the manuscript's first draft and created the figures. M.E.K, A.L.  
461 and D.T. revised the manuscript. L.McL., as the lab manager, oversaw order placements and maintained the lab  
462 organization. M.E.K and A.N.K. provided funding. All authors read, edited and approved the final manuscript.

### 463 **7.0.1 Conflict of interest statement.**

464 None declared.

## 465 **References**

- 466 [1] Friedberg, E. C. (2003) DNA damage and repair. *Nature*, **421**, 436–440.
- 467 [2] Wyman, C. and Kanaar, R. (2006) DNA double-strand break repair: All's well that ends well. *Annual Review*  
468 *of Genetics*, **40**, 363–383.
- 469 [3] Dillingham, M. S. and Kowalczykowski, S. C. (2008) RecBCD Enzyme and the Repair of Double-Stranded  
470 DNA Breaks. *Microbiology and Molecular Biology Reviews*, **72**(4), 642–671.

- 471 [4] Sinha, A. K., Possoz, C., Durand, A., Desfontaines, J. M., Barre, F. X., Leach, D. R., and Michel, B. (2018)  
472 Broken replication forks trigger heritable DNA breaks in the terminus of a circular chromosome. *PLoS Genet-*  
473 *ics*, **14**(3), 1–28.
- 474 [5] Kohanski, M. A., Dwyer, D. J., and Collins, J. J. (2010) How antibiotics kill bacteria: from targets to networks.  
475 *Nature Reviews Microbiology*, **8**(6), 423–435.
- 476 [6] Michel, B. and Leach, D. (August, 2012) Homologous Recombination—Enzymes and Pathways. *EcoSal Plus*,  
477 **5**(1).
- 478 [7] Lepore, A., Taylor, H., Landgraf, D., Okumus, B., Jaramillo-Riveri, S., McLaren, L., Bakshi, S., Paulsson,  
479 J., and Karoui, M. E. (2019) Quantification of very low-abundant proteins in bacteria using the HaloTag and  
480 epi-fluorescence microscopy. *Scientific Reports*,.
- 481 [8] Kalita, I., Iosub, I. A., Granneman, S., and Karoui, M. E. (2021) Fine-tuning of RecBCD expres-  
482 sion by post-transcriptional regulation is required for optimal DNA repair in Escherichia coli. *bioRxiv*, p.  
483 2021.10.23.465540.
- 484 [9] Kuzminov, A. (1999) Recombinational Repair of DNA Damage in Escherichia coli and Bacteriophage  $\lambda$  .  
485 *Microbiology and Molecular Biology Reviews*, **63**(4), 751–813.
- 486 [10] Chaudhury, A. M. and Smith, G. R. (1984) Escherichia coli recBC deletion mutants. *Journal of Bacteriology*,  
487 **160**(2), 788–791.
- 488 [11] Dermić, D., Halupecki, E., Zahradka, D., and Petranović, M. (2005) RecBCD enzyme overproduction impairs  
489 DNA repair and homologous recombination in Escherichia coli. *Research in Microbiology*, **156**(3), 304–311.
- 490 [12] Baharoglu, Z. and Mazel, D. (2014) SOS, the formidable strategy of bacteria against aggressions. *FEMS mi-*  
491 *crobiology reviews*, **38**(6), 1126–1145.
- 492 [13] Kreuzer, K. N. (2013) DNA Damage Responses in Prokaryotes : Replication Forks. *Cold Spring Harb Perspect*  
493 *Biol*, pp. 1–23.
- 494 [14] Bos, J., Zhang, Q., Vyawahare, S., Rogers, E., Rosenberg, S. M., and Austin, R. H. (2015) Emergence of  
495 antibiotic resistance from multinucleated bacterial filaments. *Proceedings of the National Academy of Sciences*  
496 *of the United States of America*, **112**(1), 178–183.
- 497 [15] Singleton, M. R., Dillingham, M. S., Gaudier, M., Kowalczykowski, S. C., and Wigley, D. B. (2004) Crystal  
498 structure of RecBCD enzyme reveals a machine for processing DNA breaks. *Nature*, **432**(7014), 187–193.
- 499 [16] Amundsen, S. K., Taylor, A. F., Reddy, M., and Smith, G. R. (2007) Intersubunit signaling in RecBCD enzyme,  
500 a complex protein machine regulated by Chi hot spots. *Genes and Development*, **21**(24), 3296–3307.



- 501 [17] Smith, G. R. (2012) How RecBCD Enzyme and Chi Promote DNA Break Repair and Recombination: a Molec-  
502 ular Biologist's View. *Microbiology and Molecular Biology Reviews*, **76**(2), 217–228.
- 503 [18] Churchill, J. J. and Kowalczykowski, S. C. (2000) Identification of the RecA protein-loading domain of  
504 RecBCD enzyme. *Journal of Molecular Biology*, **297**(3), 537–542.
- 505 [19] Spies, M. and Kowalczykowski, S. C. (2006) The RecA binding locus of RecBCD is a general domain for  
506 recruitment of DNA strand exchange proteins. *Molecular Cell*, **21**(4), 573–580.
- 507 [20] Lucarelli, D., Wang, Y. A., Galkin, V. E., Yu, X., Wigley, D. B., and Egelman, E. H. (2009) The RecB Nuclease  
508 Domain Binds to RecA-DNA Filaments: Implications for Filament Loading. *Journal of Molecular Biology*,  
509 **391**(2), 269–274.
- 510 [21] Yu, M., Souaya, J., and Julin, D. A. (1998) Identification of the nuclease active site in the multifunctional  
511 RecBCD enzyme by creation of a chimeric enzyme. *Journal of Molecular Biology*, **283**(4), 797–808.
- 512 [22] Anderson, D. G., Churchill, J. J., and Kowalczykowski, S. C. (1999) A single mutation, RecB(D1080A),  
513 eliminates RecA protein loading but not Chi recognition by RecBCD enzyme. *Journal of Biological Chemistry*,.
- 514 [23] Ivančić-Baće, I., Peharec, P., Moslavac, S., Škrobot, N., Salaj-Šmic, E., and Brčić-Kostić, K. (2003) RecFOR  
515 function is required for DNA repair and recombination in a RecA loading-deficient recB mutant of *Escherichia*  
516 *coli*. *Genetics*, **163**(2), 485–494.
- 517 [24] Taylor, A. F. and Smith, G. R. (1999) Regulation of homologous recombination: Chi inactivates RecBCD  
518 enzyme by disassembly of the three subunits. *Genes and Development*, **13**(7), 890–900.
- 519 [25] Lesterlin, C., Ball, G., Schermelleh, L., and Sherratt, D. J. (2014) RecA bundles mediate homology pairing  
520 between distant sisters during DNA break repair. *Nature*, **506**(7487), 249–253.
- 521 [26] Amarh, V., White, M. A., and Leach, D. R. (2018) Dynamics of RecA-mediated repair of replication-dependent  
522 DNA breaks. *Journal of Cell Biology*, **217**(7), 2299–2307.
- 523 [27] Ghodke, H., Paudel, B. P., Lewis, J. S., Jergic, S., Gopal, K., Romero, Z. J., Wood, E. A., Woodgate, R., Cox,  
524 M. M., and Oijen, A. M. (2019) Spatial and temporal organization of reca in the *escherichia coli* dna-damage  
525 response. *eLife*, **8**, 1–37.
- 526 [28] Wiktor, J., Gynnå, A. H., Leroy, P., Larsson, J., Coceano, G., Testa, I., and Elf, J. (2021) RecA finds homolo-  
527 gous DNA by reduced dimensionality search. *Nature*, **597**(7876), 426–429.
- 528 [29] Wiktor, J., Van Der Does, M., Büller, L., Sherratt, D. J., and Dekker, C. (2018) Direct observation of end  
529 resection by RecBCD during double-stranded DNA break repair in vivo. *Nucleic Acids Research*, **46**(4), 1821–  
530 1833.

- 531 [30] Payne-Dwyer, A. L., Syeda, A. H., Shepherd, J. W., Frame, L., and Leake, M. C. (2022) RecA and RecB:  
532 Probing complexes of DNA repair proteins with mitomycin C in live *Escherichia coli* with single-molecule  
533 sensitivity. *Journal of the Royal Society Interface*, **19**(193).
- 534 [31] St-Pierre, F., Cui, L., Priest, D. G., Endy, D., Dodd, I. B., and Shearwin, K. E. (2013) One-step cloning and  
535 chromosomal integration of DNA. *ACS Synthetic Biology*, **2**(9), 537–541.
- 536 [32] Jaramillo-Riveri, S., Broughton, J., McVey, A., Pilizota, T., Scott, M., and El Karoui, M. (2022) Growth-  
537 dependent heterogeneity in the DNA damage response in *Escherichia coli*. *Molecular Systems Biology*, **18**(5),  
538 1–14.
- 539 [33] Merlin, C., McAteer, S., and Masters, M. (2002) Tools for characterization of *Escherichia coli* genes of un-  
540 known function. *Journal of Bacteriology*, **184**(16), 4573–4581.
- 541 [34] Wertman, K. F., Wyman, A. R., and Botstein, D. (January, 1986) Host/vector interactions which affect the  
542 viability of recombinant phage lambda clones. *Gene*, **49**(2), 253–262.
- 543 [35] Bakshi, S., Choi, H., Rangarajan, N., Barns, K. J., Bratton, B. P., and Weisshaar, J. C. (2014) Nonperturbative  
544 imaging of nucleoid morphology in live bacterial cells during an antimicrobial peptide attack. *Applied and  
545 Environmental Microbiology*, **80**(16), 4977–4986.
- 546 [36] Tokunaga M. (2010) Highly inclined thin illumination enables clear single-molecule imaging in cells. *Nature  
547 Methods*, **5**(Fall), 1–7.
- 548 [37] Ollion, J., Elez, M., and Robert, L. (2019) High-throughput detection and tracking of cells and intracellular  
549 spots in mother machine experiments. *Nature Protocols*, **14**(11), 3144–3161.
- 550 [38] Ollion, J., Ollion, C., Gassiat, E., Lehericy, L., and Corff, S. L. (2021) Joint self-supervised blind denoising  
551 and noise estimation. *arXiv*,.
- 552 [39] Crocker, J. (1996) Methods of Digital Video Microscopy for Colloidal Studies. *Journal of Colloid and Interface  
553 Science*, **179**(1), 298–310.
- 554 [40] Uphoff, S., Reyes-Lamothe, R., de Leon, F. G., Sherratt, D. J., and Kapanidis, A. N. (April, 2013) Single-  
555 molecule DNA repair in live bacteria. *Proceedings of the National Academy of Sciences*, **110**(20), 8063–8068.
- 556 [41] Stracy, M., Schweizer, J., Sherratt, D. J., Kapanidis, A. N., Uphoff, S., and Lesterlin, C. (2021) Transient non-  
557 specific DNA binding dominates the target search of bacterial DNA-binding proteins. *Molecular Cell*, **81**(7),  
558 1499–1514.e6.
- 559 [42] Ovesný, M., Křížek, P., Borkovec, J., Švindrych, Z., and Hagen, G. M. (2014) ThunderSTORM: A compre-  
560 hensive ImageJ plug-in for PALM and STORM data analysis and super-resolution imaging. *Bioinformatics*,  
561 **30**(16), 2389–2390.

- 562 [43] Vrljic, M., Nishimura, S. Y., Brasselet, S., Moerner, W. E., and McConnell, H. M. (2002) Translational diffu-  
563 sion of individual class II MHC membrane proteins in cells. *Biophysical Journal*, **83**(5), 2681–2692.
- 564 [44] Landgraf, D., Okumus, B., Chien, P., Baker, T. A., and Paulsson, J. (April, 2012) Segregation of molecules at  
565 cell division reveals native protein localization. *Nature Methods*, **9**(5), 480–482.
- 566 [45] Grimm, J. B., English, B. P., Choi, H., Muthusamy, A. K., Mehl, B. P., Dong, P., Brown, T. A., Lippincott-  
567 Schwartz, J., Liu, Z., Lionnet, T., and Lavis, L. D. (2016) Bright photoactivatable fluorophores for single-  
568 molecule imaging. *Nature Methods*, **13**(12), 985–988.
- 569 [46] Banaz, N., Mäkelä, J., and Uphoff, S. (2019) Choosing the right label for single-molecule tracking in live  
570 bacteria: Side-by-side comparison of photoactivatable fluorescent protein and Halo tag dyes. *Journal of Physics*  
571 *D: Applied Physics*, **52**(6).
- 572 [47] Kapanidis, A. N., Uphoff, S., and Stracy, M. (2018) Understanding Protein Mobility in Bacteria by Tracking  
573 Single Molecules. *Journal of Molecular Biology*, **430**(22), 4443–4455.
- 574 [48] Stracy, M., Jaciuk, M., Uphoff, S., Kapanidis, A. N., Nowotny, M., Sherratt, D. J., and Zawadzki, P. (2016)  
575 Single-molecule imaging of UvrA and UvrB recruitment to DNA lesions in living *Escherichia coli*. *Nature*  
576 *Communications*, **7**, 1–9.
- 577 [49] Stracy, M., Wollman, A. J., Kaja, E., Gapinski, J., Lee, J. E., Leek, V. A., McKie, S. J., Mitchenall, L. A.,  
578 Maxwell, A., Sherratt, D. J., Leake, M. C., and Zawadzki, P. (2019) Single-molecule imaging of DNA gyrase  
579 activity in living *Escherichia coli*. *Nucleic Acids Research*, **47**(1), 210–220.
- 580 [50] Uphoff, S., Lord, N. D., Okumus, B., Potvin-Trottier, L., Sherratt, D. J., and Paulsson, J. (2016) Stochastic  
581 activation of a DNA damage response causes cell-to-cell mutation rate variation. *Science*, **351**(6277), 1094–  
582 1097.
- 583 [51] Ivanković, S. and Dermić, D. (June, 2012) DNA End Resection Controls the Balance between Homologous  
584 and Illegitimate Recombination in *Escherichia coli*. *PLoS ONE*, **7**(6), e39030.
- 585 [52] Taylor, A. and Smith, G. R. (1980) Unwinding and rewinding of DNA by the RecBC enzyme. *Cell*, **22**(2),  
586 447–457.
- 587 [53] Jason Wong, C., Lucius, A. L., and Lohman, T. M. (September, 2005) Energetics of DNA End Binding by  
588 *E. coli* RecBC and RecBCD Helicases Indicate Loop Formation in the 3-Single-stranded DNA Tail. *Journal of*  
589 *Molecular Biology*, **352**(4), 765–782.
- 590 [54] Kumar, M., Mommer, M. S., and Sourjik, V. (February, 2010) Mobility of Cytoplasmic, Membrane, and DNA-  
591 Binding Proteins in *Escherichia coli*. *Biophysical Journal*, **98**(4), 552–559.

- 592 [55] Wu, C. G. and Lohman, T. M. (October, 2008) Influence of DNA End Structure on the Mechanism of Initiation  
593 of DNA Unwinding by the Escherichia coli RecBCD and RecBC Helicases. *Journal of Molecular Biology*,  
594 **382**(2), 312–326.
- 595 [56] Boehmer, P. E. and Emmerson, P. T. (1992) The RecB subunit of the Escherichia coli RecBCD enzyme couples  
596 ATP hydrolysis to DNA unwinding. *Journal of Biological Chemistry*, **267**(7), 4981–4987.
- 597 [57] Michel, B., Sinha, A. K., and Leach, D. R. F. (2018) Replication Fork Breakage and Restart in Escherichia  
598 coli. *Microbiology and Molecular Biology Reviews*, **82**(3).
